# Supplementary material for: p31comet promotes homologous recombination by inactivating REV7 through the TRIP13 ATPase
Source: PubMed Central journal article supplement — Proc Natl Acad Sci U S A. 2020 Oct 13;117(43):26795–803. doi: 10.1073/pnas.2008830117 (PMC7604461; doi:10.1073/pnas.2008830117), 2020-10-13
Supplement: pnas.2008830117.sapp.pdf [file pnas.2008830117.sapp.pdf]

Supplementary Information for

## **p31<sup>comet</sup> promotes homologous recombination by inactivating REV7 through the TRIP13 ATPase**

**Prabha Sarangi\*<sup>1</sup>, Connor S. Clairmont\*<sup>1</sup>, Lucas D. Galli<sup>1</sup>,  
Lisa A. Moreau<sup>1</sup>, Alan D. D'Andrea<sup>1,2</sup>**

1. Department of Radiation Oncology, Dana-Farber Cancer Institute, Boston, MA, 02215, USA

2. Center for DNA Damage and Repair, Dana-Farber Cancer Institute, Boston, MA, 02215, USA

Corresponding Author:

Alan D. D'Andrea, M.D.  
Director: Center for DNA Damage and Repair  
Harvard Medical School  
Department of Radiation Oncology  
Dana-Farber Cancer Institute, HIM 243  
450 Brookline Ave.  
Boston, MA 02215  
617-632-2080  
FAX: 617-632-6069  
[Alan.Dandrea@dfci.harvard.edu](mailto:Alan.Dandrea@dfci.harvard.edu)

**This PDF file includes:**

Figures S1 to S5

**Fig S1**

**A**

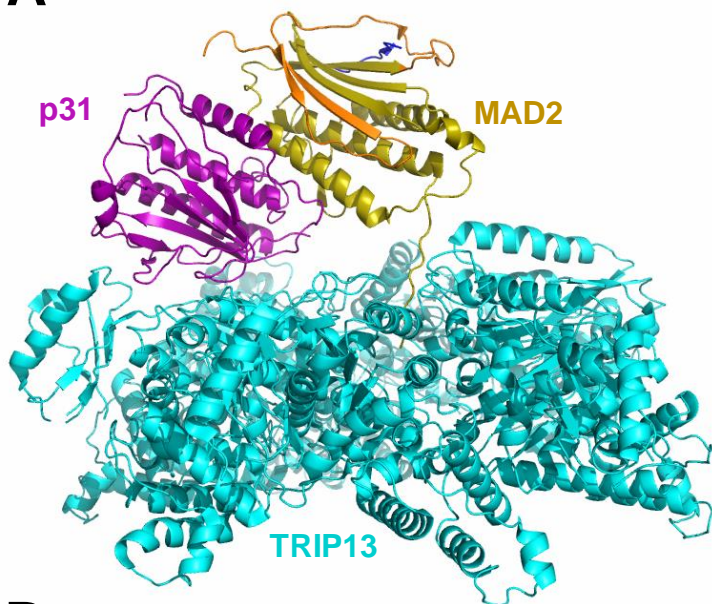

**C**

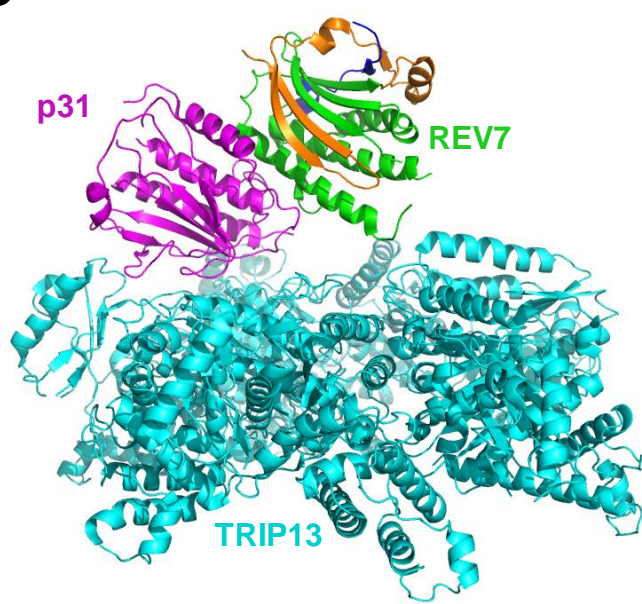

**B**

|                  |                                     |
|------------------|-------------------------------------|
| H._sapiens_REV7  | .MTTLTR..QDLNFGQVV...ADVLCFLELVAVHL |
| M._musculus_REV7 | .MTTLTR..QDLNFGQVV...ADVLSFLELVAVHL |
| G._gallus_REV7   | .MTTLTR..QDLNFGQVV...ADVLSFLELVAVHL |
| X._laevis_REV7   | .MTTLTR..QDLNFGQVV...ADILCFLELVAVHL |
| H._sapiens_MAD2  | MALQLSR...EQ.GIT.LRGSAEIVAEFFSFGINS |
| M._musculus_MAD2 | MAQQLAR...EQ.GIT.LRGSAEIVAEFFSFGINS |
| G._gallus_MAD2   | MAAQLSR...EQQGIT.LRGSAEIVAEFFSYGINS |
| X._laevis_MAD2   | MAGQLTR...E..GIT.LKGSAEIVSEFFFCGINS |
| Consensus        | .Φ.ζLζR...-...ζ.Φ...A-ΦΦ.EFΦ...Φζ.  |

**E**

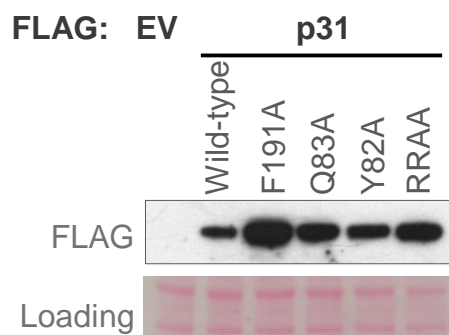

**D**

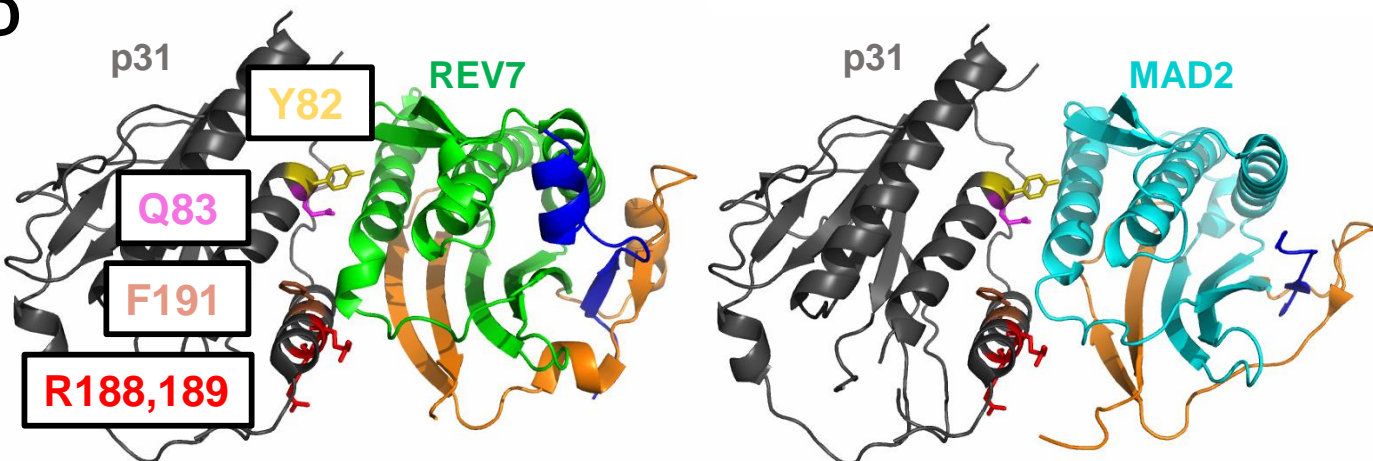

## Figure S1: Conservation of p31 and TRIP13 interaction between REV7 and MAD2

(A) Published Cryo-EM structure of the TRIP13-p31-MAD2 complex (PDB: 6F0X). (B) Primary sequence alignment of REV7 and MAD2 from various organisms. The conserved TRIP13 binding motif in REV7 and MAD2 is indicated by the yellow box. In the consensus sequence: red/ $\Phi$  indicates hydrophobic residues, green/ $\zeta$  indicates polar residues, pink indicates positively charged residues, blue/- indicates negatively charged residues. (C) Model of REV7-p31-TRIP13 structure based on structural alignment of REV7 (PDB: 3VU7) and MAD2. (D) Reorientation of the published and modelled structures in Figure S1A and S1C to highlight p31 residues predicted to be important for the REV7-p31 interaction. (E) Western blot showing the expression levels of the p31 variants in *p31*<sup>-/-</sup> HEK293T cells.

**Fig S2**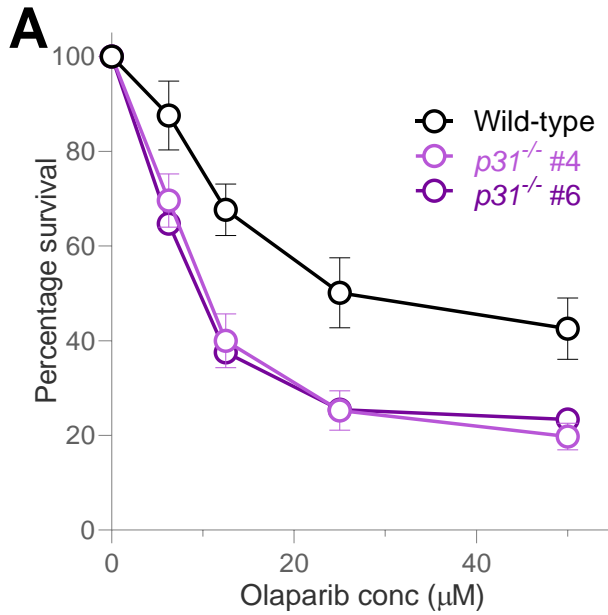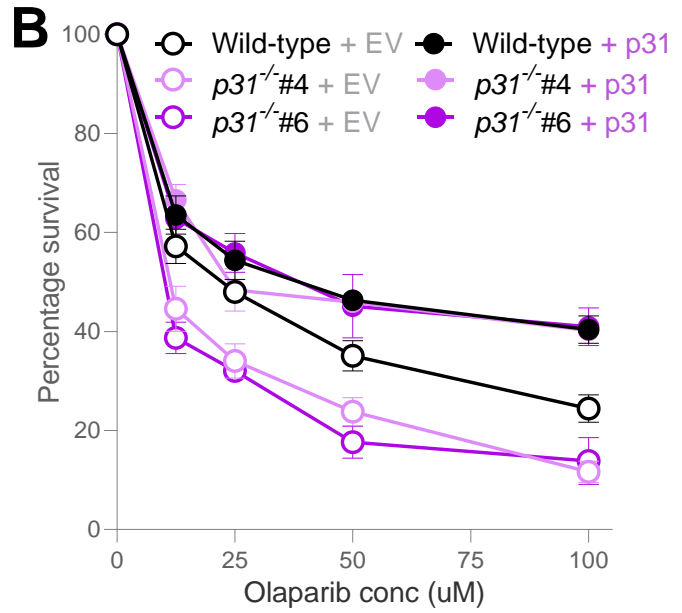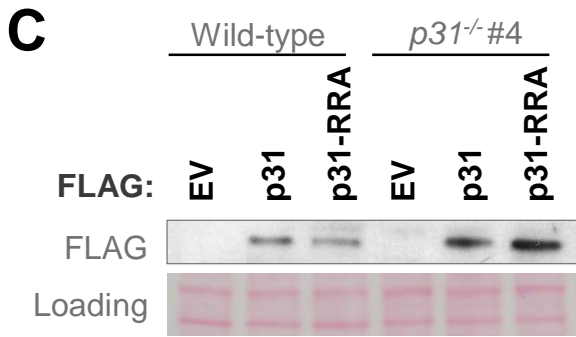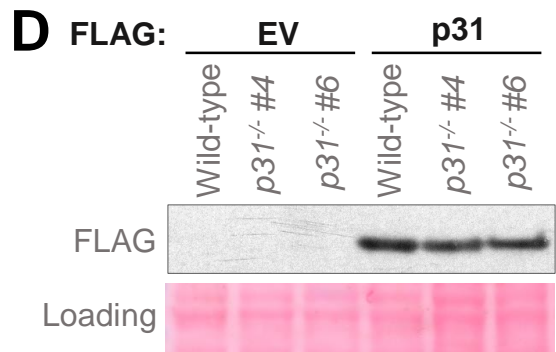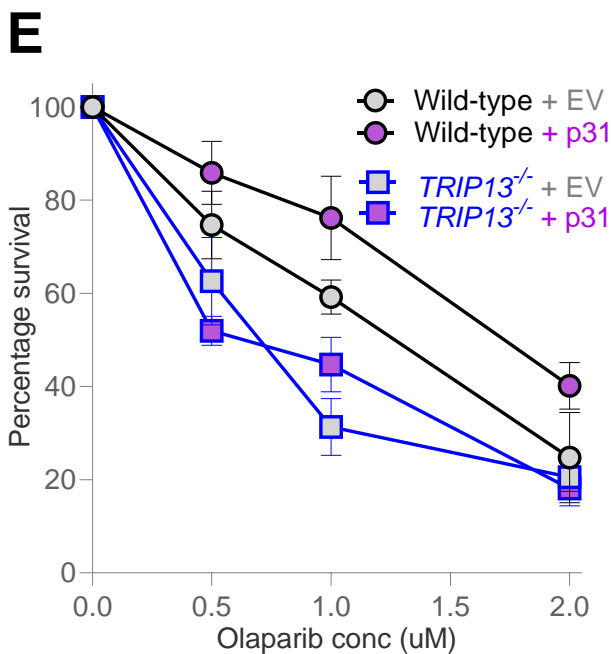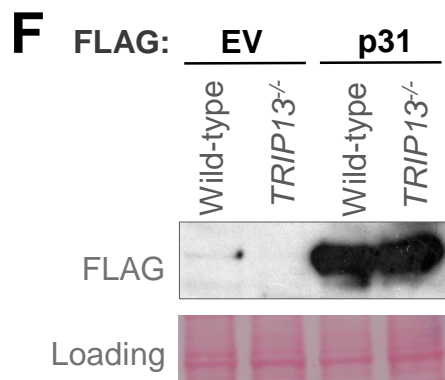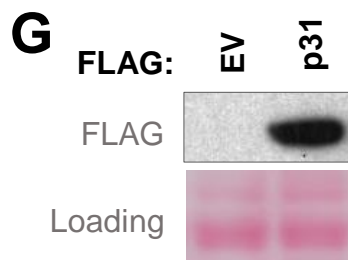

## Figure S2: p31 affects HR proficiency

(A) Short-term cytotoxicity curve of wild-type and two *p31*<sup>-/-</sup> clones in U2OS cells upon treatment with various doses of Olaparib. Means and standard deviations of 3 independent experiments are depicted. (B) Short-term cytotoxicity curve of wild-type and two *p31*<sup>-/-</sup> clones in U2OS cells with ectopic expression of empty vector (EV) or wild-type p31 upon treatment with various doses of Olaparib. Means and standard deviations of 3 independent experiments are depicted. (C) Western blot showing the ectopic expression of FLAG-tagged wild-type p31 and RR188,189AA mutant p31 in wild-type and *p31*<sup>-/-</sup> U2OS cells, related to Figs. 2C-D. (D) Western blot showing the ectopic expression of FLAG-p31, related to Fig. S2B. (E) Clonogenic survival curve of wild-type and *TRIP13*<sup>-/-</sup> U2OS cells expressing empty-vector (EV) or overexpressing p31, at various doses of Olaparib. Means and standard deviations of 3 independent experiments are depicted. (F) Western blot showing overexpression of p31 in wild-type or *TRIP13*<sup>-/-</sup> U2OS cells, related to Fig. S2E. (G) Western blot showing overexpression of p31 in *TP53*<sup>-/-</sup>, *BRCA1*<sup>-/-</sup> RPE-1 cells, related to Fig. 2E.

**Fig S3**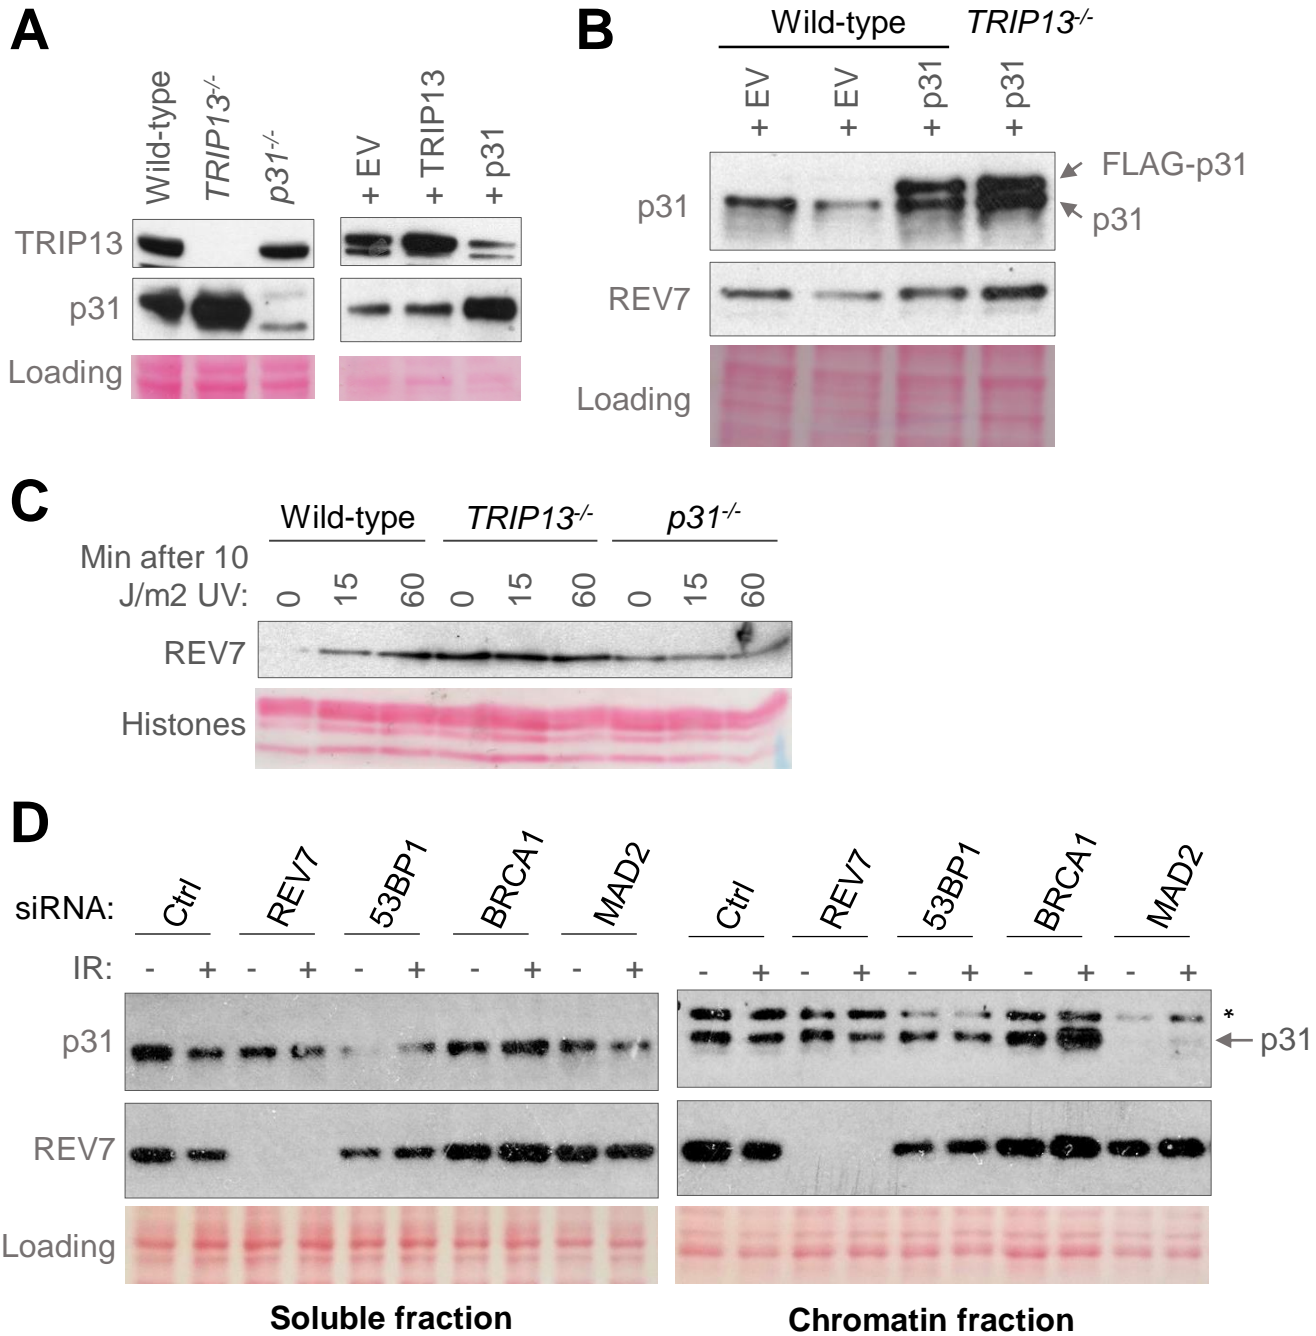

**Figure S3: p31 affects the activation of REV7 in response to damage**

(A) Western blot showing the lack of expression of the respective protein in *TRIP13*<sup>-/-</sup> and *p31*<sup>-/-</sup> U2OS cells, and overexpression of p31 and TRIP13, related to Figs. 3A-B. (B)

Western blot showing the ectopic overexpression of p31 in wild-type and *TRIP13*<sup>-/-</sup> U2OS cells, related to Fig. 3B-C. (C) Western blot of chromatin bound REV7 from wild-type,

*TRIP13*<sup>-/-</sup>, or *p31*<sup>-/-</sup> U2OS cells following irradiation with 10 J/m<sup>2</sup> of UV light. (D)

Western blot showing soluble and chromatin-associated REV7 and p31 following siRNA-mediated knockdown of various proteins. Asterisk denotes non-specific band.

**Fig S4**

**A**

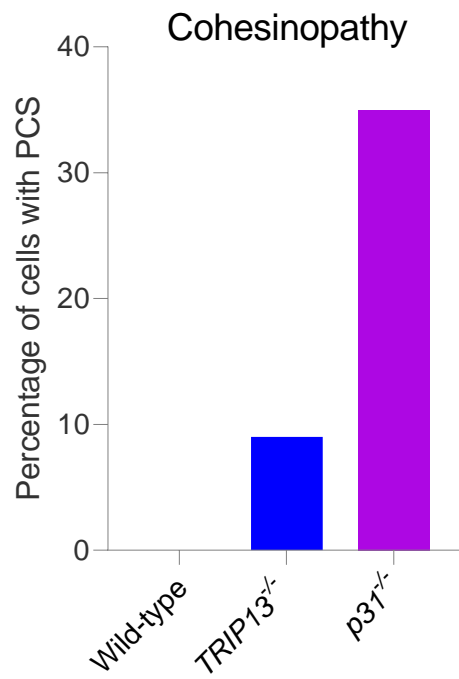

**B**

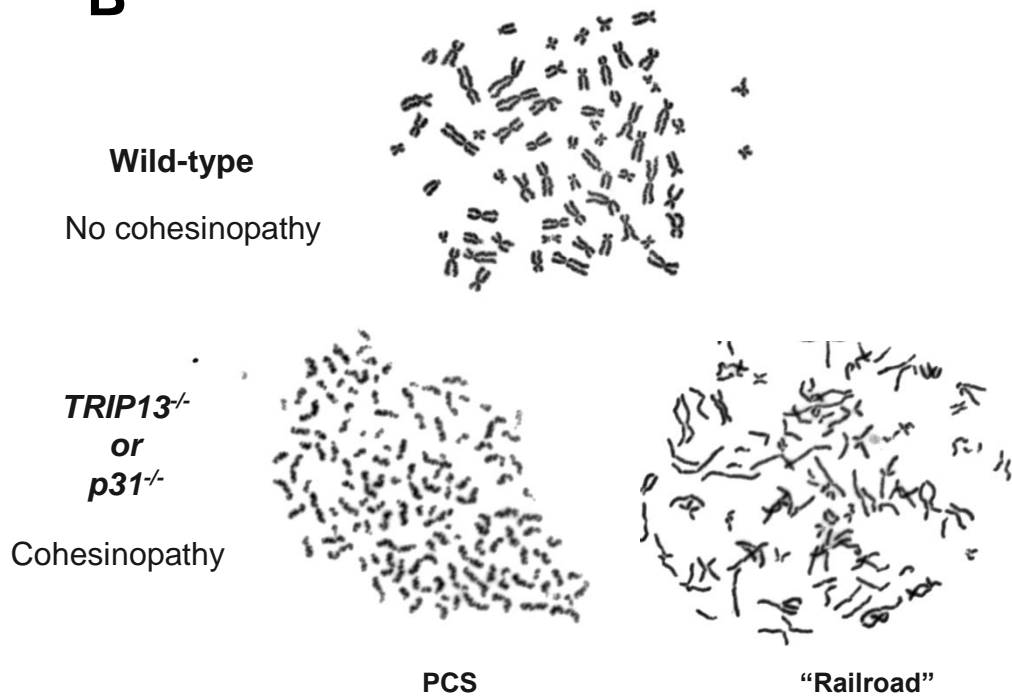



## Figure S4: p31 Deficiency Induces Chromosomal Aberrations

(A) Graph showing the prevalence of cohesinopathy observed in metaphase spreads from wild-type, *TRIP13*<sup>-/-</sup> and *p31*<sup>-/-</sup> HEK293T cells. (B) Representative images showing cohesinopathy phenotypes quantified in Fig. S4A.

**Fig S5**

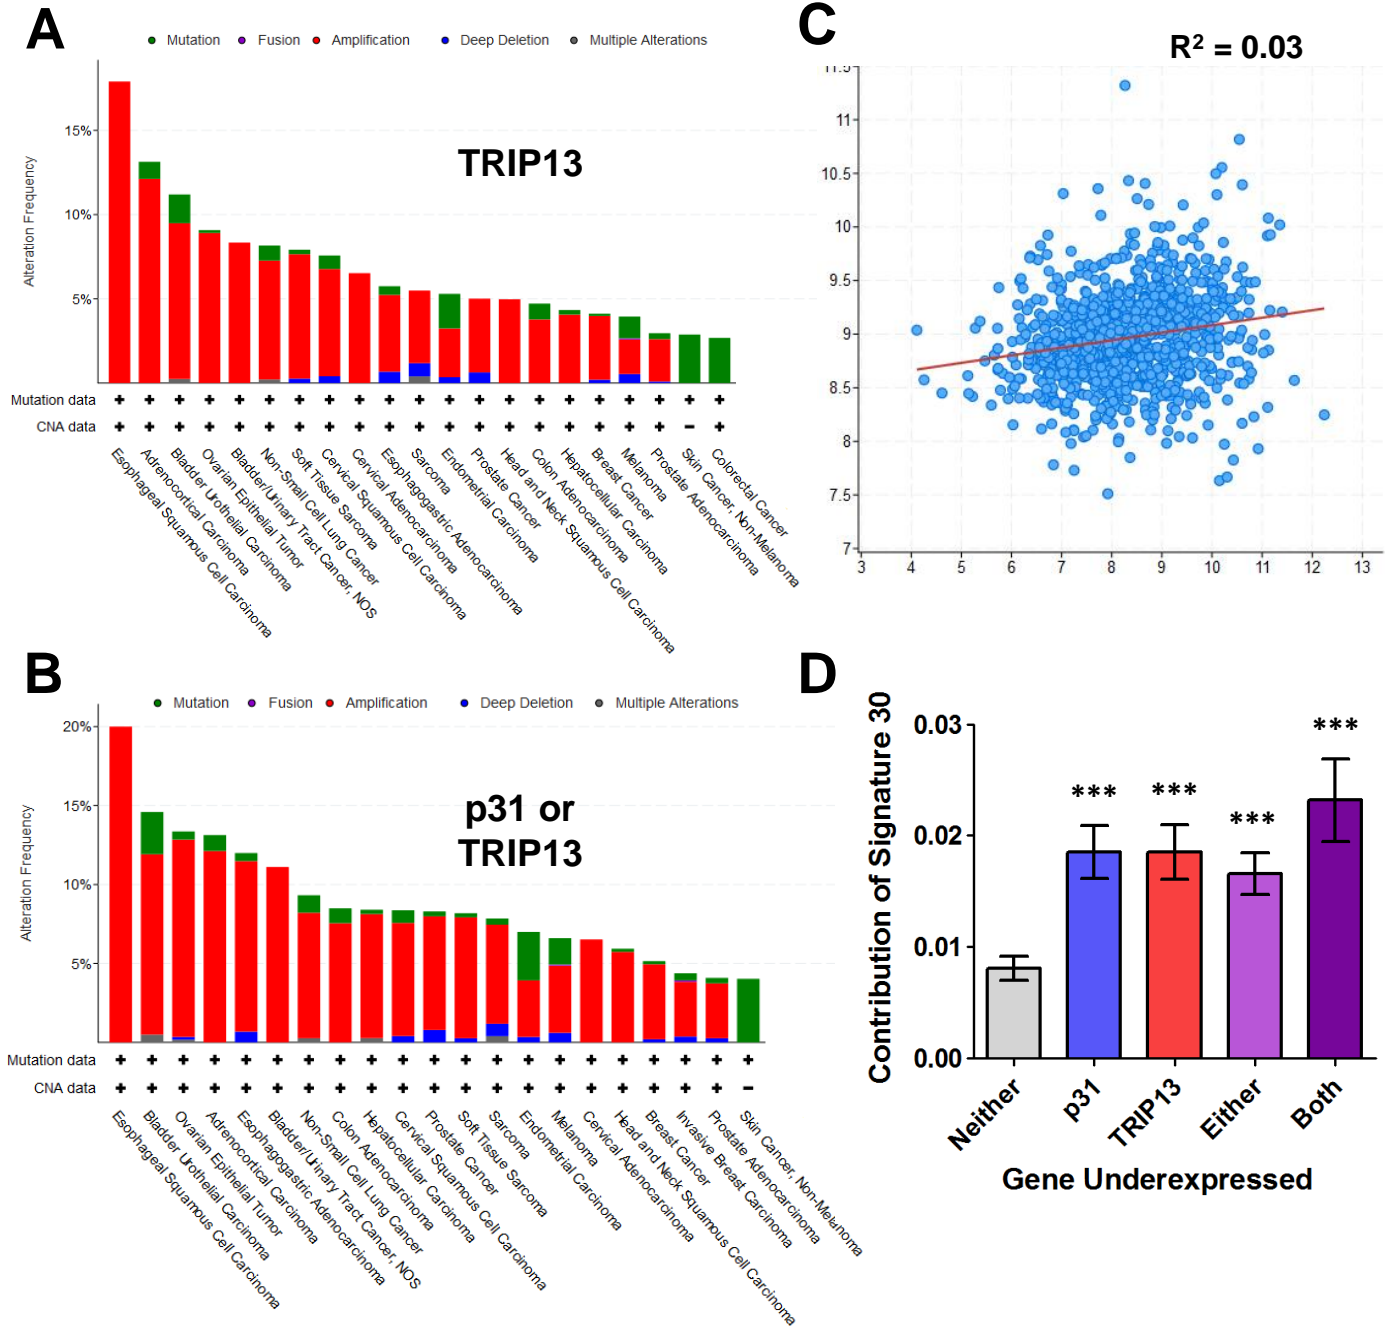

**Figure S5: TRIP13 and p31 are independently upregulated in similar cancer types.**

(A) Bar chart showing the prevalence of amplifications (red), deletions (blue) and mutations (green) of the TRIP13 gene across an array of cancer types in The Cancer Genome Atlas (TCGA). (B) Similar to Figs. 5A and S5A, showing the prevalence of alterations in either TRIP13 or p31. (C) Scatter plot of TRIP13 expression vs p31 expression in breast cancers, showing no correlation.  $R^2 = 0.03$  (Pearson's correlation coefficient). (D) Graph showing the contribution of mutation signature 30 in cancers with low expression of TRIP13 and/or p31 compared to cancers with normal expression of both genes. \*\*\* $p < 0.001$ , Mann-Whitney test, two-tailed.
